# Supplementary material
Source: PubMed Central journal article supplement (PMC8522211)

**Supplemental Fig.** miR-155 expression in patient tumor samples by RT-qPCR. \*marks patients who died from metastatic melanoma.

Supplemental figure

### miR-155 expression by RT-qPCR

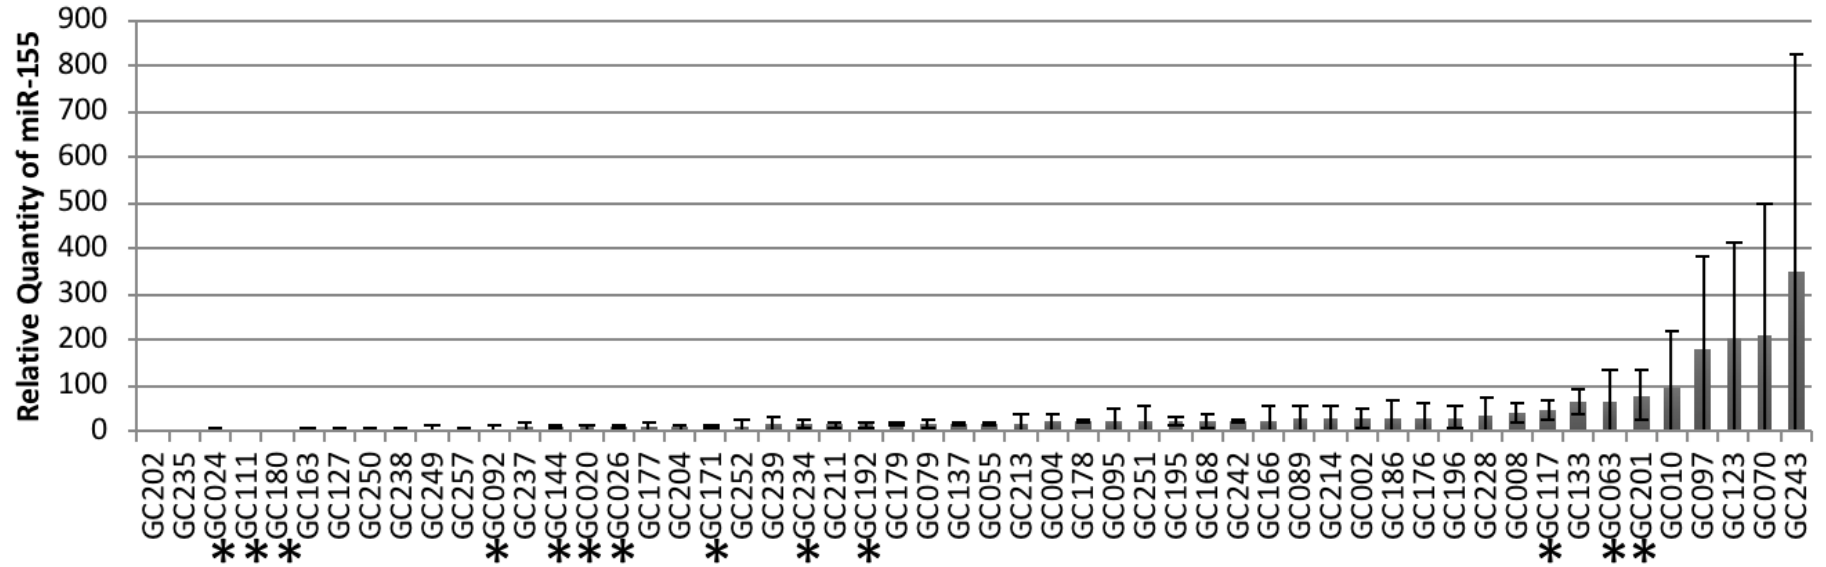

Supplement: NIHMS1746709-supplement-Supplemental_Figure.pdf [file NIHMS1746709-supplement-Supplemental_Figure.pdf]
